# Supplementary material for: Definition and Criteria for Diagnosing Cesarean Scar Disorder
Source: PubMed Central journal article supplement (PMC10061236; doi:10.1001/jamanetworkopen.2023.5321), 2023-03-29
Supplement: jamanetwopen-e235321-s001.pdf [file jamanetwopen-e235321-s001.pdf]

## Supplemental Online Content

Klein Meuleman SJM, Murji A, van den Bosch T, et al; CSDi Study Group. Definition and criteria for diagnosing cesarean scar disorder. *JAMA Netw Open*. 2023;6(3):e235321.  
doi:10.1001/jamanetworkopen.2023.5321

**eAppendix.** Search Strategy

**eFigure.** Flowchart Showing Studies Identified Through Literature Search

**eTable.** Results of Consensus Rounds

This supplemental material has been provided by the authors to give readers additional information about their work.

## eAppendix 1. Search strategy

### PubMed 5 November 2021

| Search | Query                                                                                                                                                                                                                                                                                                                                                                 | Results |
|--------|-----------------------------------------------------------------------------------------------------------------------------------------------------------------------------------------------------------------------------------------------------------------------------------------------------------------------------------------------------------------------|---------|
| #4     | #1 AND #2 AND #3                                                                                                                                                                                                                                                                                                                                                      | 454     |
| #3     | ("Cesarean Section"[MeSH Terms] OR "cesarea*" [Title/Abstract] OR "caesarea*" [Title/Abstract] OR "c section" [Title/Abstract] OR "c sections" [Title/Abstract] OR ("abdominal" [Title/Abstract] AND "deliver*" [Title/Abstract]) OR "postcesarea*" [Title/Abstract] OR "postcaesaria*" [Title/Abstract]) AND (2019/6/21:2021/11/5[pdat])                             | 11.199  |
| #2     | ("Uterus"[MeSH Terms] OR "Uterine Diseases"[MeSH Terms] OR "Uterus" [Title/Abstract] OR "uterine" [Title/Abstract] OR "myometri*" [Title/Abstract] OR "endometri*" [Title/Abstract] OR "endomyometri*" [Title/Abstract] OR "myoendometri*" [Title/Abstract]) AND (2019/6/21:2021/11/5[pdat])                                                                          | 32617   |
| #1     | ("Cicatrix"[MeSH Terms] OR "cicatr*" [Title/Abstract] OR "scar" [Title/Abstract] OR "scars" [Title/Abstract] OR "scarring" [Title/Abstract] OR "isthmocèle*" [Title/Abstract] OR "niche" [Title/Abstract] OR "niches" [Title/Abstract] OR "anechoic" [Title/Abstract] OR "pouch*" [Title/Abstract] OR "diverticul*" [Title/Abstract]) AND (2019/6/21:2021/11/5[pdat]) | 28399   |

### Embase 5 November 2021

| Search | Query                                                                                                                                                                                                                                                                             | Results |
|--------|-----------------------------------------------------------------------------------------------------------------------------------------------------------------------------------------------------------------------------------------------------------------------------------|---------|
| #5     | #1 AND #2 AND #3 AND [embase]/lim                                                                                                                                                                                                                                                 | 771     |
| #4     | #1 AND #2 AND #3                                                                                                                                                                                                                                                                  | 826     |
| #3     | ('cesarean section'/exp OR cesarea*:ab,ti OR caesarea*:ab,ti OR 'c section':ab,ti OR 'c sections':ab,ti OR (abdominal:ab,ti AND deliver*:ab,ti) OR postcesarea*:ab,ti OR postcaesarea*:ab,ti) AND [21-06-2019]/sd NOT [06-11-2021]/sd                                             | 23589   |
| #2     | ('uterus'/exp OR 'uterus disease'/exp OR uterus:ab,ti OR uterine:ab,ti OR myometri*:ab,ti OR endometri*:ab,ti OR endomyometri*:ab,ti OR myoendometri*:ab,ti) AND [21-06-2019]/sd NOT [06-11-2021]/sd                                                                              | 61054   |
| #1     | ('wound dehiscence'/exp OR 'scar formation'/exp OR 'scar'/exp OR cicatr*:ab,ti OR scar:ab,ti OR scars:ab,ti OR scarring:ab,ti OR isthmocèle*:ab,ti OR niche:ab,ti OR niches:ab,ti OR anechoic:ab,ti OR pouch*:ab,ti OR diverticul*:ab,ti) AND [21-06-2019]/sd NOT [06-11-2021]/sd | 45232   |

**eFigure 1. Flowchart Showing Studies Identified Through Literature Search**

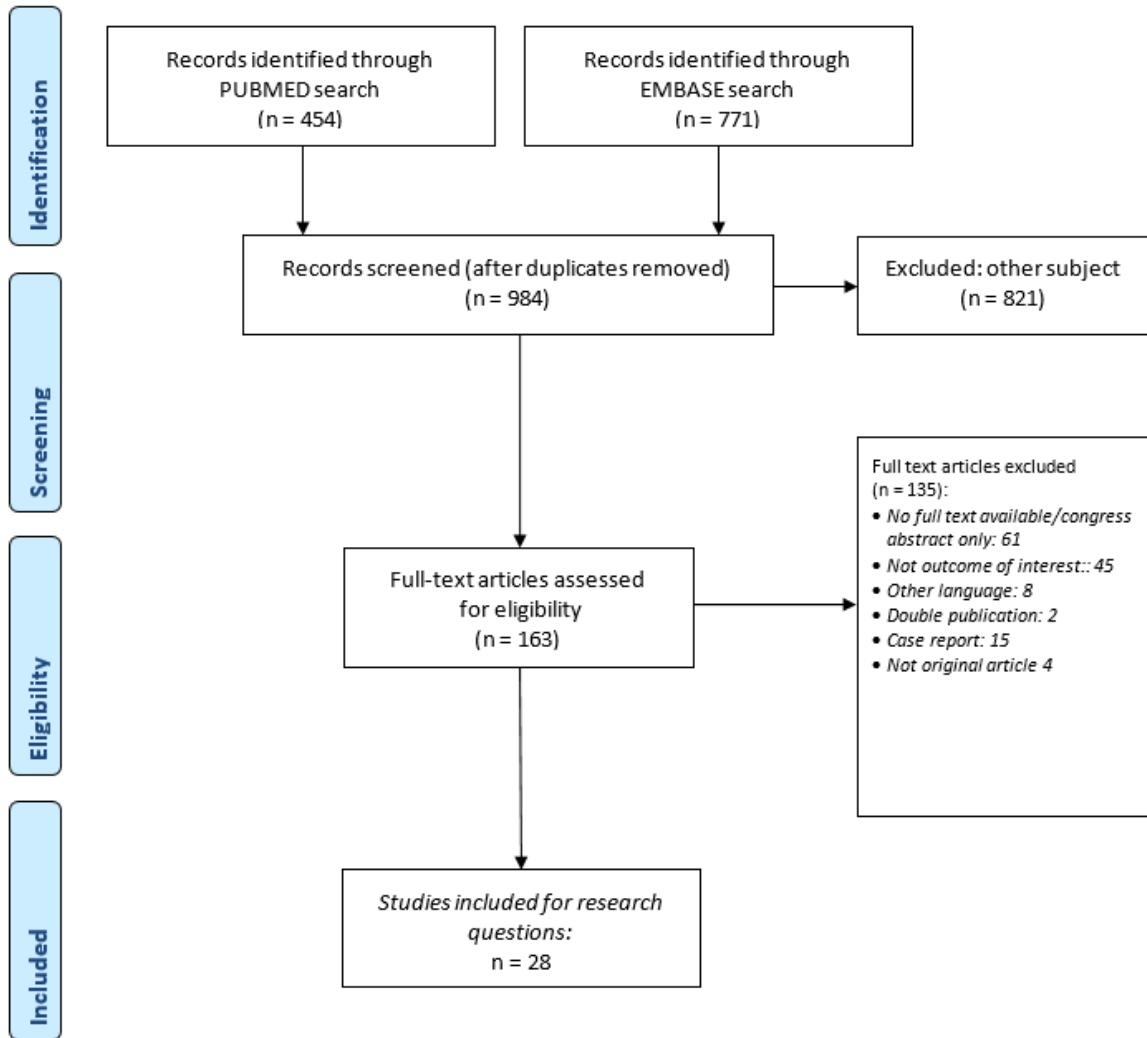

**eTable 1. Results of Consensus Rounds**

| Question                                                                                                                                      | Nomenclature           |                              |                    |                              |                    |                                      |
|-----------------------------------------------------------------------------------------------------------------------------------------------|------------------------|------------------------------|--------------------|------------------------------|--------------------|--------------------------------------|
|                                                                                                                                               | RoA in round 1(%)      | Consensus reached in round 1 | RoA in round 2 (%) | Consensus reached in round 2 | RoA in round 3 (%) | Consensus reached in round 3         |
| Which of the following conditions would best cover the condition caused by a symptomatic niche: Disorder, Syndrome, Disease?                  | 67.7                   | No                           | 93.5               | Yes: included disorder       | NA                 | NA                                   |
| Which of the following terms would best cover the condition caused by a symptomatic niche? Niche or Cesarean Scar (Disorder/Disease/Syndrome) | 61.3                   | No                           | 54.8               | No                           | 96.2               | Yes: included Cesarean Scar Disorder |
| Symptom                                                                                                                                       | Gynecological symptoms |                              |                    |                              |                    |                                      |
|                                                                                                                                               | RoA in round 1(%)      | Consensus reached in round 1 | RoA in round 2 (%) | Consensus reached in round 2 | RoA in round 3 (%) | Consensus reached in round 3:        |
| Postmenstrual spotting                                                                                                                        | 83.9                   | Yes: include                 |                    |                              |                    |                                      |
| *Primary vs secondary symptom?                                                                                                                |                        |                              | 80.6               | Yes: primary symptom         | NA                 | NA                                   |
| Dysmenorrhea                                                                                                                                  | 83.9                   | Yes: include                 | NA                 | NA                           | NA                 | NA                                   |
| Chronic pelvic pain                                                                                                                           | 83.9                   | Yes: include                 |                    |                              |                    |                                      |
| *Primary vs secondary symptom?                                                                                                                |                        |                              | 87.1               | Yes: secondary symptom       | NA                 | NA                                   |
| Abnormal uterine bleeding                                                                                                                     | 83.9                   | Yes: include                 | NA                 | NA                           | NA                 | NA                                   |
| Prolonged menses                                                                                                                              | 83.9                   | Yes: include                 | NA                 | NA                           | NA                 | NA                                   |
| Avoiding sexual intercourse                                                                                                                   | 80.6                   | Yes: include                 |                    |                              |                    |                                      |
| *Primary vs secondary symptom?                                                                                                                |                        |                              | 90.3               | Yes: secondary symptom       | NA                 | NA                                   |
| Ovulation pain                                                                                                                                | -74,2                  | Yes: exclude                 | NA                 | NA                           | NA                 | NA                                   |
| * Do you agree to combine pain dysmenorrhea and pain during spotting to pain during uterine bleeding?                                         |                        |                              | 71.0               | Yes: include                 |                    |                                      |
| Pain during spotting?                                                                                                                         | 22.6                   | no                           | NA                 | NA                           | NA                 | NA                                   |

|                                                                                                               |       |    |       |                        |    |    |
|---------------------------------------------------------------------------------------------------------------|-------|----|-------|------------------------|----|----|
| *Pain during uterine bleeding                                                                                 |       |    | 72.7  | Yes: include           |    |    |
| *Primary vs secondary symptom?                                                                                | NA    | NA | 84.2  | Yes: primary symptom   | NA | NA |
| * Do you agree to combine spotting, prolonged menses and abnormal uterine bleeding to postmenstrual spotting? | NA    | NA | 71.0  | Yes: include           |    |    |
| Abnormal vaginal discharge                                                                                    | 29.0  | no | 72.4  | Yes: include           |    |    |
| *Primary vs secondary symptom?                                                                                |       |    | 87.5  | Yes: secondary symptom | NA | NA |
| Odor associated with abnormal uterine blood loss                                                              | 48.4  | no | 73.0  | Yes: include           |    |    |
| *Primary vs secondary symptom?                                                                                |       |    | 83.4  | Yes: secondary symptom | NA | NA |
| Dyspareunia                                                                                                   | 29.0  | no | 70.4  | Yes: include           |    |    |
| *Primary vs secondary symptom?                                                                                |       |    | 72.7  | Yes: secondary symptom | NA | NA |
| Pollakisuria                                                                                                  | -3.6  | no | -71.4 | Yes: exclude           | NA | NA |
| Polyuria                                                                                                      | -63.3 | no | -86.7 | Yes: exclude           | NA | NA |
| Pain during micturition                                                                                       | -36.7 | no | -87.1 | Yes: exclude           | NA | NA |
| Pain after urinating                                                                                          | -33.3 | no | -93.3 | Yes: exclude           | NA | NA |

#### Fertility related symptoms

| Symptom                                                                               | RoA in round 1(%) | Consensus reached in round 1 | RoA in round 2 (%) | Consensus reached in round 2 | RoA in round 3 (%) | Consensus reached in round 3: |
|---------------------------------------------------------------------------------------|-------------------|------------------------------|--------------------|------------------------------|--------------------|-------------------------------|
| Secondary unexplained infertility                                                     | 82.1              | yes: include                 |                    |                              |                    |                               |
| *Primary vs secondary symptom?                                                        |                   |                              | 70.0               | Yes: secondary symptom       | NA                 | NA                            |
| Secondary unexplained infertility despite ART                                         | 81.5              | yes: include                 |                    |                              |                    |                               |
| *Primary vs secondary symptom?                                                        |                   |                              | 72.4               | Yes: secondary symptom       | NA                 | NA                            |
| Technical issues with catheter during embryo transfer                                 | 80.0              | yes: include                 |                    |                              |                    |                               |
| *Primary vs secondary symptom?                                                        |                   |                              | 73.1               | Yes: primary symptom         | NA                 | NA                            |
| Secondary unexplained infertility combined with intrauterine fluid                    | 67.9              | no                           | 92.9               | Yes: include                 |                    |                               |
| *Primary vs secondary symptom?                                                        |                   |                              | 70.4               | Yes: primary symptom         | NA                 | NA                            |
| Miscarriage                                                                           | 0.0               | no                           |                    |                              | NA                 | NA                            |
| *More research is needed to conclude if miscarriages are a symptom of a uterine niche | NA                | NA                           | 96.7               | Yes: include                 | NA                 | NA                            |

| Obstetrical symptoms                                                                                                                     |                   |                              |                    |                              |                    |                               |
|------------------------------------------------------------------------------------------------------------------------------------------|-------------------|------------------------------|--------------------|------------------------------|--------------------|-------------------------------|
| Symptom                                                                                                                                  | RoA in round 1(%) | Consensus reached in round 1 | RoA in round 2 (%) | Consensus reached in round 2 | RoA in round 3 (%) | Consensus reached in round 3: |
| Cesarean scar pregnancy                                                                                                                  | 71.0              | Yes: include                 | NA                 | NA                           | NA                 | NA                            |
| Dehiscence of the uterus                                                                                                                 | 73.3              | Yes: include                 | NA                 | NA                           | NA                 | NA                            |
| Abnormal adhesive placenta                                                                                                               | 80.0              | Yes: include                 | NA                 | NA                           | NA                 | NA                            |
| Uterine rupture                                                                                                                          | 50.0              | no                           | NA                 | NA                           | NA                 | NA                            |
| *Women with a obstetrical problem related to a uterine niche, have a complication of uterine niche disorder and not the disorder itself. | NA                | NA                           | 70.4               | Yes: include                 | NA                 | NA                            |

| Social relationships and participation |                   |                              |                    |                              |                    |                               |
|----------------------------------------|-------------------|------------------------------|--------------------|------------------------------|--------------------|-------------------------------|
| Symptom                                | RoA in round 1(%) | Consensus reached in round 1 | RoA in round 2 (%) | Consensus reached in round 2 | RoA in round 3 (%) | Consensus reached in round 3: |
| Fatigue                                | -29.0             | no                           | -87.1              | Yes: exclude                 | NA                 | NA                            |
| Negative self-image                    | 16.7              | no                           | 78.6               | yes: include                 |                    |                               |
| * Primary versus secondary symptom?    |                   |                              | 88.0               | yes: secondary symptom       | NA                 | NA                            |
| Loneliness                             | -32.1             | no                           | -100               | Yes: exclude                 | NA                 | NA                            |
| Discomfort during leisure activities   | 22.5              | no                           | 70.4               | yes: include                 |                    |                               |
| *Primary vs secondary symptom?         |                   |                              | 77.3               | yes: secondary symptom       | NA                 | NA                            |
| Depression                             | -10.3             | no                           | -74.2              | Yes: exclude                 | NA                 | NA                            |

| Categorization of symptoms                                                                                     |                   |                              |                    |                              |                    |                               |
|----------------------------------------------------------------------------------------------------------------|-------------------|------------------------------|--------------------|------------------------------|--------------------|-------------------------------|
| Question:                                                                                                      | RoA in round 1(%) | Consensus reached in round 1 | RoA in round 2 (%) | Consensus reached in round 2 | RoA in round 3 (%) | Consensus reached in round 3: |
| ** Do you agree with this categorization of symptoms?                                                          | NA                | NA                           | NA                 | NA                           | 93.1               | Yes                           |
| ** The proposed definition works for me, knowing that it will be evaluated and possible adjusted after 1 year. | NA                | NA                           | NA                 | NA                           | 77.8               | Yes                           |

| <b>Diagnostic criteria</b>                                                                                                                                                                                                                   |                           |                                     |                           |                                     |                           |                                      |
|----------------------------------------------------------------------------------------------------------------------------------------------------------------------------------------------------------------------------------------------|---------------------------|-------------------------------------|---------------------------|-------------------------------------|---------------------------|--------------------------------------|
| <b>Question:</b>                                                                                                                                                                                                                             | <b>RoA in round 1 (%)</b> | <b>Consensus reached in round 1</b> | <b>RoA in round 2 (%)</b> | <b>Consensus reached in round 2</b> | <b>RoA in round 3 (%)</b> | <b>Consensus reached in round 3:</b> |
| The complaints of a symptomatic niche should start after a CS or should increase significantly after a CS.                                                                                                                                   | 80.6                      | yes: include                        | NA                        | NA                                  | NA                        | NA                                   |
| In order to call a group of symptoms a disease/disorder/syndrome, we need to define how to cure the disease. Do you think a patient can be cured from a symptomatic niche (this does not mean that all symptomatic niche should be treated)? | 87.1                      | yes: include                        | NA                        | NA                                  | NA                        | NA                                   |
| It is obligatory that the complaints of a symptomatic niche should start after a CS.                                                                                                                                                         | 64.5                      | no                                  | 96.8                      | yes: included                       | NA                        | NA                                   |
| A patient need to be premenopausal to diagnose a symptomatic niche.                                                                                                                                                                          | 48.4                      | no                                  | 100                       | yes: included                       | NA                        | NA                                   |
| Do you think there should be a minimal duration after a CS before you can make the diagnosis of a symptomatic niche?                                                                                                                         | 41.9                      | no                                  | NA                        | NA                                  | NA                        | NA                                   |
| *Minimal of three regular menstrual cycles after CS before diagnosis                                                                                                                                                                         | NA                        | NA                                  | 93.5                      | yes: included                       | NA                        | NA                                   |
| <b>Conditions to exclude</b>                                                                                                                                                                                                                 |                           |                                     |                           |                                     |                           |                                      |
| <b>Condition:</b>                                                                                                                                                                                                                            | <b>RoA in round 1 (%)</b> | <b>Consensus reached in round 1</b> | <b>RoA in round 2 (%)</b> | <b>Consensus reached in round 2</b> | <b>RoA in round 3 (%)</b> | <b>Consensus reached in round 3:</b> |
| Other uterine intracavitary pathology                                                                                                                                                                                                        | 93.5                      | yes: include                        | NA                        | NA                                  | NA                        | NA                                   |
| Other causes of postmenstrual spotting (such as continuous oral contraceptive use or IUD)                                                                                                                                                    | 80.6                      | yes: include                        | NA                        | NA                                  | NA                        | NA                                   |
| Anovulatory cycles (due to endocrine disorders or breastfeeding)                                                                                                                                                                             | 29.0                      | no                                  | 100                       | yes: included                       | NA                        | NA                                   |
| Endometriosis                                                                                                                                                                                                                                | 16.1                      | no                                  | -74.2                     | yes: excluded                       | NA                        | NA                                   |

|                             |      |    |       |               |    |    |
|-----------------------------|------|----|-------|---------------|----|----|
| coagulation abnormalities   | 22.6 | no | -87.1 | yes: excluded | NA | NA |
| *Cervical dysplasia         | NA   | NA | 74.2  | yes: included | NA | NA |
| *Vaginal/uterine infections | NA   | NA | 74.2  | yes: included | NA | NA |
| *Adenomyosis                | NA   | NA | -72.4 | yes: excluded | NA | NA |
| *Uterine fibroids           | NA   | NA | -86.7 | yes: excluded | NA | NA |

Legend: \* added in round 2, based on the feedback of previous round, \*\* added in round 3, based on the feedback in previous rounds.  
Abbreviations: RoA, Rate of Agreement; CS, Cesarean section; ART, Assisted Reproductive Technology; IUD, intrauterine device
