# Supplementary material for: Definition and Criteria for Diagnosing Cesarean Scar Disorder
Source: PubMed Central journal article supplement (PMC10061236; doi:10.1001/jamanetworkopen.2023.5321), 2023-03-29
Supplement: jamanetwopen-e235321-s002.pdf [file jamanetwopen-e235321-s002.pdf]

Supplemental Online Content: Nonauthor Collaborators

\*First name, last name, and suffix (if applicable) are required and will appear in PubMed.

| <b>*Group Name(s): Cesarean Scar Disorder Study Group</b> |                   |                              |                  |             |                                          |                                                         |                                                                                            |
|-----------------------------------------------------------|-------------------|------------------------------|------------------|-------------|------------------------------------------|---------------------------------------------------------|--------------------------------------------------------------------------------------------|
| <b>*First Name and Middle Initial(s)</b>                  | <b>*Last Name</b> | <b>*Suffix (eg, Jr, III)</b> | Academic Degrees | Institution | Location (city, state/province, country) | Role or Contribution, eg, chair, principal investigator | Group (if more than 1 Group listed in the byline) and/or Subgroup (eg, Steering Committee) |
| Pere                                                      | Barri             |                              |                  |             |                                          |                                                         |                                                                                            |
| Tayfun                                                    | Cok               |                              |                  |             |                                          |                                                         |                                                                                            |
| Grigoris                                                  | Grimbizis         |                              |                  |             |                                          |                                                         |                                                                                            |
| Justin                                                    | Clark             |                              |                  |             |                                          |                                                         |                                                                                            |
| Samir                                                     | Helmy-Bader       |                              |                  |             |                                          |                                                         |                                                                                            |
| Davor                                                     | Jurkovic          |                              |                  |             |                                          |                                                         |                                                                                            |
| Attilio                                                   | di Spiezio Sardo  |                              |                  |             |                                          |                                                         |                                                                                            |
| Sandra                                                    | Tanahatoe         |                              |                  |             |                                          |                                                         |                                                                                            |
| Marcus                                                    | Rijken            |                              |                  |             |                                          |                                                         |                                                                                            |
| Dirk                                                      | Timmerman         |                              |                  |             |                                          |                                                         |                                                                                            |
| Frederic                                                  | Chantraine        |                              |                  |             |                                          |                                                         |                                                                                            |
| Ally                                                      | Murji             |                              |                  |             |                                          |                                                         |                                                                                            |
| Shuichiro                                                 | Tsuji             |                              |                  |             |                                          |                                                         |                                                                                            |
| Ilan                                                      | Timor             |                              |                  |             |                                          |                                                         |                                                                                            |
| Mary                                                      | Connor            |                              |                  |             |                                          |                                                         |                                                                                            |
| Andrea                                                    | Kaelin Agten      |                              |                  |             |                                          |                                                         |                                                                                            |
| Noel                                                      | Laure             |                              |                  |             |                                          |                                                         |                                                                                            |
| Wouter                                                    | Hehenkamp         |                              |                  |             |                                          |                                                         |                                                                                            |
| Roy                                                       | Mashiach          |                              |                  |             |                                          |                                                         |                                                                                            |
| Loïc                                                      | Sentilhes         |                              |                  |             |                                          |                                                         |                                                                                            |
| Michal                                                    | Promorski         |                              |                  |             |                                          |                                                         |                                                                                            |
| Osama                                                     | Naji              |                              |                  |             |                                          |                                                         |                                                                                            |
| Gwendolin                                                 | Manegold-Brauer   |                              |                  |             |                                          |                                                         |                                                                                            |
| Maddalena                                                 | Morlando          |                              |                  |             |                                          |                                                         |                                                                                            |
| Thierry                                                   | van den Bosch     |                              |                  |             |                                          |                                                         |                                                                                            |
| Sally                                                     | Collins           |                              |                  |             |                                          |                                                         |                                                                                            |
| Jian                                                      | Zhang             |                              |                  |             |                                          |                                                         |                                                                                            |
| Olivier                                                   | Donnez            |                              |                  |             |                                          |                                                         |                                                                                            |

Supplemental Online Content: Nonauthor Collaborators

\*First name, last name, and suffix (if applicable) are required and will appear in PubMed.

| <b>*First Name and Middle Initial(s)</b> | <b>*Last Name</b> | <b>*Suffix (eg, Jr, III)</b> | Academic Degrees | Institution | Location (city, state/province, country) | Role or Contribution, eg, chair, principal investigator | Group (if more than 1 Group listed in the byline) and/or Subgroup (eg, Steering Committee) |
|------------------------------------------|-------------------|------------------------------|------------------|-------------|------------------------------------------|---------------------------------------------------------|--------------------------------------------------------------------------------------------|
| Shlomi                                   | Cohen             |                              |                  |             |                                          |                                                         |                                                                                            |
| Judith                                   | Huirne            |                              |                  |             |                                          |                                                         |                                                                                            |
