# Supplementary material for: Definition and Criteria for Diagnosing Cesarean Scar Disorder
Source: PubMed Central journal article supplement (PMC10061236; doi:10.1001/jamanetworkopen.2023.5321), 2023-03-29
Supplement: jamanetwopen-e235321-s003.pdf [file jamanetwopen-e235321-s003.pdf]

## Data Sharing Statement

Klein Meuleman. Definition and Criteria for Diagnosing Cesarean Scar Disorder. *JAMA Netw Open*. Published March 29, 2023. doi:10.1001/jamanetworkopen.2023.5321

### Data

**Data available:** No

### Additional Information

**Explanation for why data not available:** the Delphi round outcomes are already in the supplementary table
